# Supplementary material for: Effect of Regulatory Architecture on Broad versus Narrow Sense Heritability
Source: PLOS journal article supplement (doi:10.1371/journal.pcbi.1003053), 2013-05-09

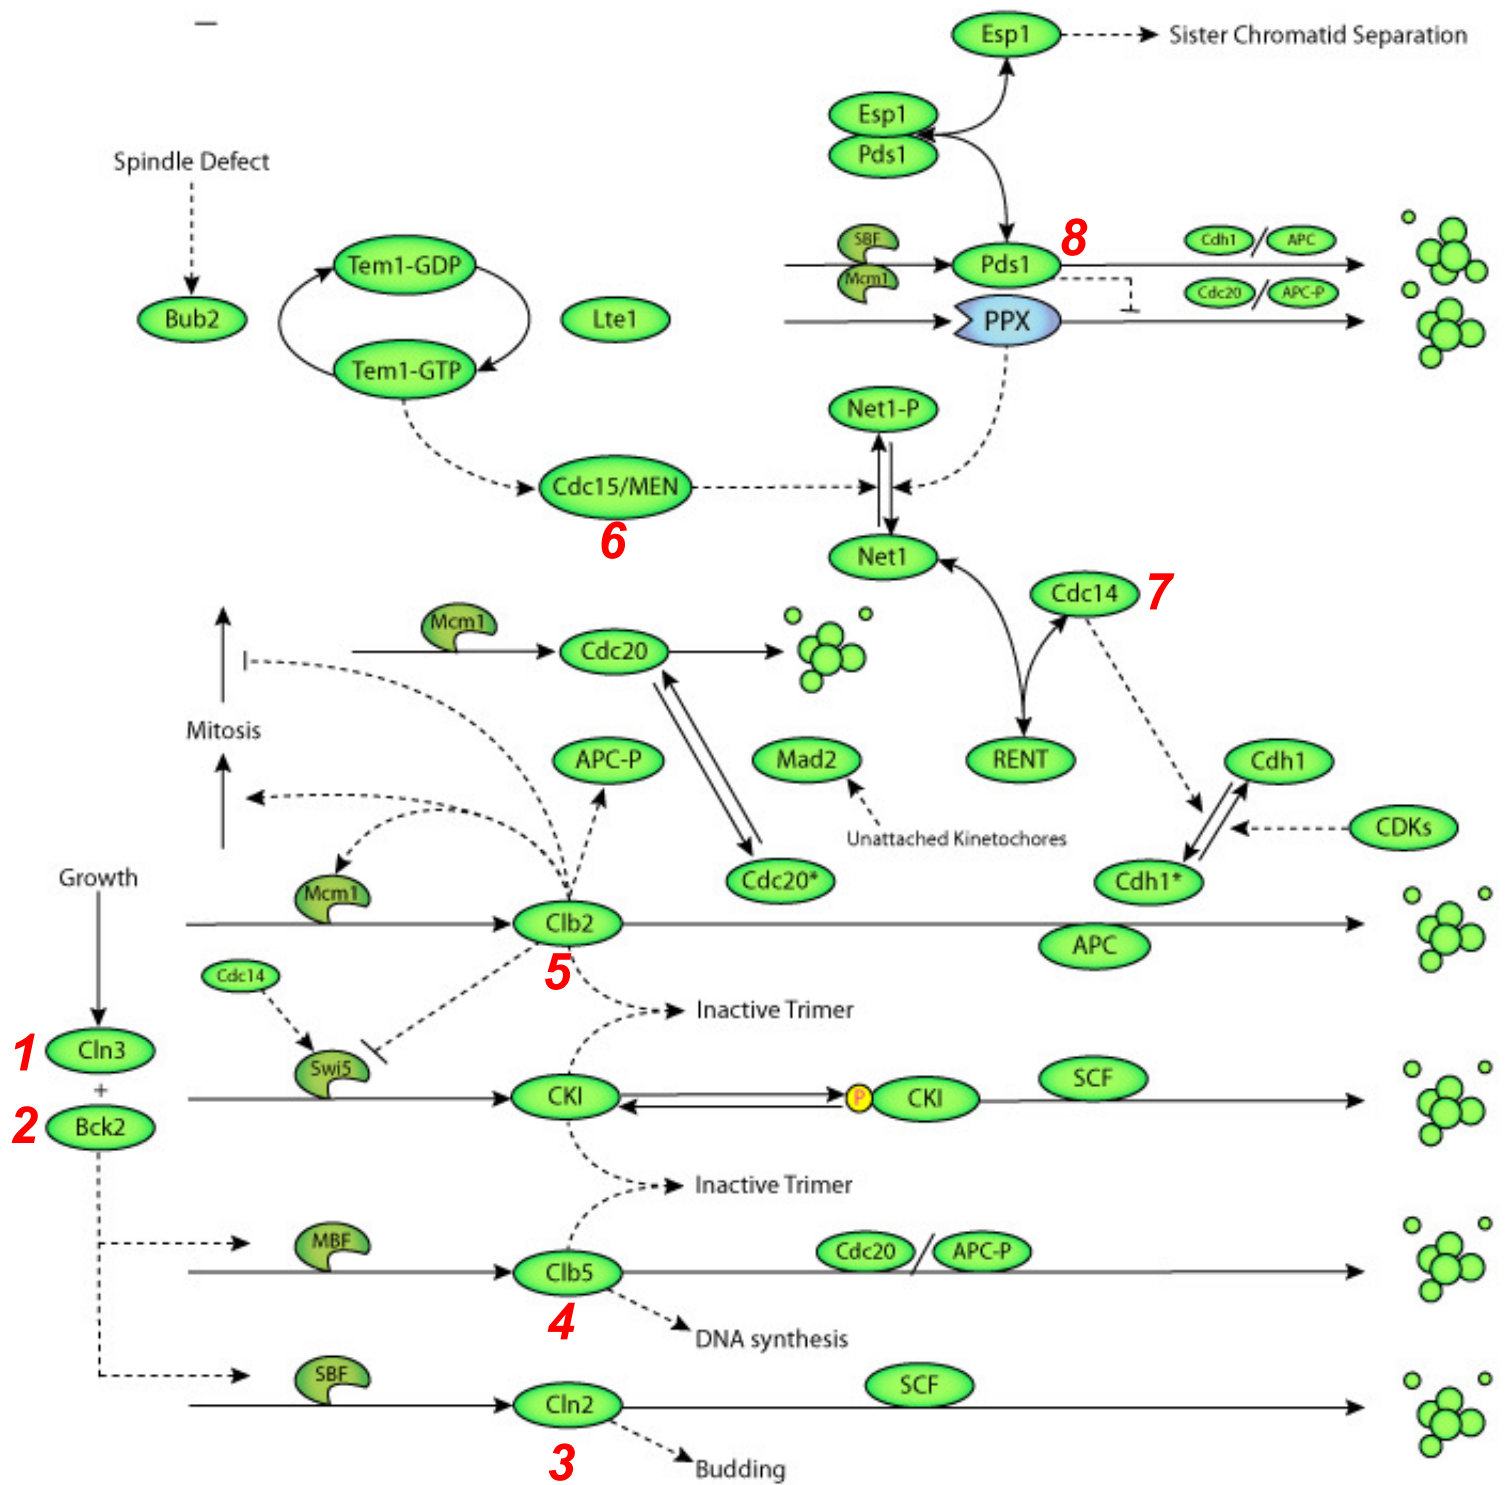

Supplement: S4 (10.1371/journal.pcbi.1003053.s004) [file journal.pcbi.1003053.s004]
