# Supplementary material for: Effect of Regulatory Architecture on Broad versus Narrow Sense Heritability
Source: PLOS journal article supplement (doi:10.1371/journal.pcbi.1003053), 2013-05-09
Supplement: S21 (10.1371/journal.pcbi.1003053.s021) [file journal.pcbi.1003053.s021]

301 Moved Permanently

# Moved Permanently

The document has moved here.

---

Apache Server at www.ploscompbiol.org Port 80
